# Supplementary material for: Theory Precedes Practice: Simulation-Based Learning Enhances Long-Term Recall, but Prior Text-Based Learning Enhances Its Benefits
Source: Research Square preprint supplement (doi:10.21203/rs.3.rs-6253202/v1), 2025-04-15
Supplement: Supplementary file 1 [file 3529f273c9e9344910063921.docx]

# **Supplementary Information**

# **Theory Precedes Practice:**

# **Simulation-Based Learning Enhances Long-Term Recall,**

# **but Prior Text-Based Learning Enhances Its Benefits**

#

Angélique Lebert and Óscar Vilarroya Oliver Unitat de Recerca en Neurociència Cognitiva Departament de Psiquiatria i Medicina Legal Universitat Autònoma de Barcelona Spain and Fundació IMIM (Institut Mar d’Investigacions Mèdiques) Barcelona Spain

Correspondence concerning this article should be addressed to Óscar Vilarroya Oliver, Universitat Autònoma de Barcelona and Hospital del Mar Research Institute, Carrer Doctor Aiguader 88; 08003 Barcelona, Spain. E-mail: Oscar.Vilarroya@uab.cat

**Supplementary Materials Index:**

1. **Inclusion Criteria**
2. **Power analysis**
3. **Details of the pilot study**
4. **Self-reported measures**
5. **Clinical Interview Structure – Sessions 1 & 2**
6. **Statistical results for control factors on Reaction Time and Accuracy**
7. **Events Per Variable (EPV) Calculation and Justification for the confidence measure**
8. **Regression tables for the complete models-Imagery effects on Reaction Time and Accuracy**

**Supplementary Material 1: Inclusion Criteria**

Participants had to:

1. Be between 18 and 35 years old.
2. Be fluent in Castilian or Catalan.
3. Have no prior studies or work experience in the medical or psychology fields.
4. Have no medical history of psychiatric, neurological, motor, or physical disorders.
5. Refrain from consuming alcohol or narcotics the night before the study.
6. Consent to their anonymized data being made available to the scientific community.

**Supplementary Material 2: Power analysis**

Based on a simulation-based power analysis of our mixed-effects logistic regression model—accounting for both participant- and stimulus-level variability—we determined that a minimum sample size of 88 participants is required to achieve approximately 79% power (95% CI: 76.34–81.49%) at an alpha level of 0.10. This estimation, derived from parameters consistent with a moderate effect (β = 0.60, OR ≈ 1.82), offers what we believe to be an optimal trade-off between these two error types (Type I and Type II)—particularly under the constraints of our design, which employs real actors over a two-week intervention and includes a one-month follow-up. Indeed, Winer (1971)1 and more recently, Maier and Lakens (2022)2 underscore that when power is limited and Type I and Type II errors are equally important (or Type II errors are especially detrimental), alpha levels above 0.05 may be scientifically justified. Here, a slightly higher α increases statistical power and thus reduces the likelihood of missing true effects, while only modestly increasing the probability of false positives. Carlin et al. (2023)3 demonstrate that any associated uptick in Type I error can be substantially offset by a larger drop in Type II errors. By adopting α = 0.10, we reduce the overall number of errors in our statistical conclusions and mitigate the risk of overlooking meaningful results.

**Supplementary Material 3: Details of the pilot study**

A pilot study was conducted with 11 participants aged 18 to 30 years. With assistance from an external psychiatrist (Dr. Daniel Bergé), two distinct clinical cases were designed, each featuring a fictitious syndrome with six symptoms. In this preliminary investigation, participants identified these symptoms across three learning sessions in both a simulation condition and a control condition. Based on these results, the design of the main study was adjusted: the number of symptoms was reduced to three, the number of learning sessions to two, and the task complexity was increased by requiring participants to identify sequences of symptoms rather than isolated ones.

**Supplementary Material 4: Self-reported measures**

**Table S1**. Descriptive statistics of self-reported measures

| **Self-reported measure** | **Stat** |
| --- | --- |
| stress_level | 6 [1, 10] |
| stress_overcoming | 8 [3, 10] |
| WHO-5 | 42 [12, 72] |
| STAI_S | 18 [5, 51] |
| STAI_T | 22.5 [5, 48] |
| ERQ_R | 2.8 [1.2, 4.2] |
| ERQ_S | 1.1 [0.4, 2.4] |
| SPANE_P | 16.5 [6, 30] |
| SPANE_N | 10 [6, 18] |
| SPANE_B | 6 [-11, 24] |
| IMAG* | 5 [2, 9.5] |

*Descriptive statistics are presented as median [min, max] for continuous variables. Stress_level and Stress_overcoming reflect self-reported levels of perceived stress and coping abilities, while WHO-5 corresponds to the World Health Organization Well-Being Index. STAI-T and STAI-S represent the Trait and State subscales of the State-Trait Anxiety Inventory. ERQ_R and ERQ_S refer to the subscales of the Emotion Regulation Questionnaire assessing cognitive reappraisal and expressive suppression strategies. SPANE-P, SPANE-N, and SPANE-B correspond to the Positive, Negative, and Balance subscales of the Scale of Positive and Negative Experience, which measure affective experiences.***IMAG represents the total score of the imagery representation questionnaire, calculated from 82 participants (n = 56 females, 22 males, 4 non-binary; mean age ± SD = 22.96 ± 4.52). Note that Stress_level, Stress_overcoming, WHO-5, STAI-T, and tot_imag were evaluated prior to the learning sessions, whereas STAI-S and the SPANE subscales were assessed after the learning session at one month*.

**Table S2.** Spearman correlation matrix of behavioral and self-report measures

|  | **Accuracy** | **Reaction time** | **Confidence** | **WHO-5** | **Stress level** | **Stress overcoming** | **STAI_T** | **STAI_S** | **SPANE_P** | **SPANE_N** | **SPANE_B** | **ERQ_R** | **ERQ_S** |
| --- | --- | --- | --- | --- | --- | --- | --- | --- | --- | --- | --- | --- | --- |
| **Accuracy** | 1.000 |  |  |  |  |  |  |  |  |  |  |  |  |
| **Reaction time** | -0.10***  (p < .001) | 1.000 |  |  |  |  |  |  |  |  |  |  |  |
| **Confidence** | 0.25***  (p < .001) | -0.26***  (p < .001) | 1.000 |  |  |  |  |  |  |  |  |  |  |
| **WHO-5** | 0.04**  (p < .01) | -0.04**  (p = .01) | 0.11***  (p < .001) | 1.000 |  |  |  |  |  |  |  |  |  |
| **Stress level** | -0.01  (p = .34) | 0.04**  (p = .01) | -0.00  (p = .86) | -0.40***  (p < .001) | 1.000 |  |  |  |  |  |  |  |  |
| **Stress overcoming** | -0.00  (p = .95) | -0.06***  (p < .001) | 0.18***  (p < .001) | 0.47***  (p < .001) | -0.02  (p = .17) | 1.000 |  |  |  |  |  |  |  |
| **STAI_T** | -0.06***  (p < .001) | 0.01  (p = .71) | -0.17***  (p < .001) | -0.65***  (p < .001) | 0.51***  (p < .001) | -0.36***  (p < .001) | 1.000 |  |  |  |  |  |  |
| **STAI_S** | -0.05***  (p < .001) | 0.03*  (p < .05) | -0.25***  (p < .001) | -0.47***  (p < .001) | 0.28***  (p < .001) | -0.31***  (p < .001) | 0.61***  (p < .001) | 1.000 |  |  |  |  |  |
| **SPANE_P** | 0.03*  (p < .05) | -0.06***  (p < .001) | 0.09***  (p < .001) | 0.14***  (p < .001) | -0.15***  (p < .001) | -0.10***  (p < .001) | -0.11***  (p < .001) | -0.31***  (p < .001) | 1.000 |  |  |  |  |
| **SPANE_N** | -0.07***  (p < .001) | 0.03**  (p = .01) | -0.22***  (p < .001) | -0.15***  (p < .001) | 0.19***  (p < .001) | 0.06***  (p < .001) | 0.17***  (p < .001) | 0.46***  (p < .001) | -0.13***  (p < .001) | 1.000 |  |  |  |
| **SPANE_B** | 0.05***  (p < .001) | -0.06***  (p < .001) | 0.18***  (p < .001) | 0.20***  (p < .001) | -0.21***  (p < .001) | -0.09***  (p < .001) | -0.20***  (p < .001) | -0.48***  (p < .001) | 0.88***  (p < .001) | -0.56***  (p < .001) | 1.000 |  |  |
| **ERQ_R** | 0.05***  (p < .001) | -0.02  (p = .15) | 0.08***  (p < .001) | 0.42***  (p < .001) | -0.14***  (p < .001) | 0.22***  (p < .001) | -0.29***  (p < .001) | -0.17***  (p < .001) | 0.16***  (p < .001) | 0.01  (p = .26) | 0.13***  (p < .001) | 1.000 |  |
| **ERQ_S** | -0.01  (p = .30) | 0.00  (p = .99) | -0.07***  (p < .001) | -0.13***  (p < .001) | -0.04**  (p = .01) | -0.13***  (p < .001) | 0.15***  (p < .001) | 0.18***  (p < .001) | 0.09***  (p < .001) | 0.08***  (p < .001) | 0.05***  (p < .001) | 0.04**  (p < .01) | 1.000 |
| **IMAG*** | 0.032*  (p < .05) | -0.038**  (p = .01) | 0.039**  (p = .01) | 0.218***  (p < .001) | 0.071***  (p < .001) | 0.084***  (p < .001) | -0.115  (p < .001) | -0.146  (p < .001) | 0.16***  (p < .001) | -0.003  (p = 0.86) | 0.137***  (p < .001) | 0.22***  (p < .001) | -0.072***  (p < .001) |

*Spearman correlation matrix between all measured variables. Accuracy represents the proportion of correct responses, Reaction time is measured in milliseconds, and Confidence refers to the percentage of confidence in the given answer. Stress_level and Stress_overcoming reflect self-reported levels of perceived stress and coping abilities. WHO-5 corresponds to the World Health Organization Well-Being Index. STAI-T and STAI-S represent the Trait and State subscales of the State-Trait Anxiety Inventory. ERQ_R and ERQ_S refer to the subscales of the Emotion Regulation Questionnaire assessing cognitive reappraisal and expressive suppression strategies. SPANE-P, SPANE-N, and SPANE-B correspond to the Positive, Negative, and Balance subscales of the Scale of Positive and Negative Experience, which measure affective experiences. *IMAG represents the total score of the imagery representation questionnaire, calculated from 82 participants (n = 56 females, 22 males, 4 non-binaries; mean age ± SD = 22.96 ± 4.52). The table presents Spearman correlation coefficients (r) between all variables. Statistical significance is indicated by asterisks: *p < .05, **p < .01, ***p < .001. For non-significant results, the exact p-value is reported in parentheses. *IMAG represents the total score of the imagery representation questionnaire, calculated from 82 participants (n = 56 females, 22 males, 4 non-binaries; mean age ± SD = 22.96 ± 4.52).*

**Supplementary Material 5: Clinical Interview Structure – Sessions 1 & 2**

*This document contains a series of questions depending on the session number*

*We recommend following the questions, reformulating them if necessary to obtain all the important information about the patient.*

**CLINICAL STRUCTURE SESSION 1**

| **1.** **INTRODUCTION** |
| --- |
| Good morning. I will now ask you a few questions to guide you to the appropriate service |

| **2.** **PERSONAL INFORMATION** |
| --- |
| Could you tell me your name, age, and marital status? |
| Could you provide some information about your family? |
| Could you tell me about your profession and current job? |

| **3.** **REASON FOR CONSULTATION** |
| --- |
| Could you explain the problem that brings you here today? |

| **4.** **HISTORY OF PRESENT ILLNESS** |
| --- |
| Could you describe how these issues first started and how they have evolved over time? |

| **5.** **PERSONAL MEDICAL HISTORY** |
| --- |
| Can you tell me about the illnesses and other health problems you have had from childhood until now? |

| **6.** **ROUTINES AND HOBBIES** |
| --- |
| Can you describe what a typical day looks like for you? |
| Can you tell me about your leisure activities, sports you practice, and other hobbies? |

| **7.** **CONCLUSION** |
| --- |
| We have now completed today’s session. Next, I will explain the steps to follow from here. |

**CLINICAL STRUCTURE SESSION 2**

| **1.** **INTRODUCTION** |
| --- |
| Good morning. I will ask you a few questions again to guide you to the appropriate service. |

| **2.** **FOLLOW-UP: REASON FOR CONSULTATION** |
| --- |
| Could you remind me of the reason for your visit? |
| Have there been any changes since the last session? |

| **3.** **FAMILY MEDICAL HISTORY** |
| --- |
| Please describe in detail any illnesses or other health issues that your family members have had. |

| **4.** **PERSONAL IMPACT** |
| --- |
| Can you explain how these symptoms affect your personal life? |

| **5.** **SOCIAL IMPACT** |
| --- |
| Can you explain how these symptoms affect your social life? |

| **6.** **PROFESSIONAL IMPACT** |
| --- |
| Can you explain how these symptoms affect your professional life? |

| **7.** **CONCLUSION** |
| --- |
| We have now completed all scheduled sessions. Next, I will explain the steps to follow moving forward. |

**Supplementary Material 6: Statistical results for control factors on Reaction Time and Accuracy**

**Table S3.**

| **Variable** | **Measure** | **df** | **MSE** | **F** | **ƞ² (pes)** | **p** |
| --- | --- | --- | --- | --- | --- | --- |
| Gender | Reaction time | 2, 85 | 65890.03 | 0.020 | <.001 | 0.975 |
| Accuracy | 2, 85 | 100.11 | 0.780 | 0.018 | 0.461 |
| Laterality | Reaction time | 1, 76 | 58333.15 | 0.092 | 0.001 | 0.762 |
| Accuracy | 1, 76 | 102.36 | 0.025 | <.001 | 0.874 |
| Actor portraying the patient | Reaction time | 2, 76 | 58333.15 | 2.178 | 0.054 | 0.120 |
| Accuracy | 2, 76 | 102.36 | 0.586 | 0.015 | 0.559 |
| Evaluation order | Reaction time | 1, 76 | 58333.15 | 0.031 | <.001 | 0.862 |
| Accuracy | 1, 76 | 102.36 | 0.004 | <.001 | 0.953 |
| Order of condition | Reaction time | 1, 86 | 62868.34 | 3.140 | 0.035 | 0.080 |
| Accuracy | 1, 86 | 100.38 | 0.331 | 0.004 | 0.566 |
| Type of condition | Reaction time | 1, 87 | 26871.93 | 0.830 | 0.009 | 0.365 |
| Accuracy | 1, 87 | 83.01 | 0.187 | 0.002 | 0.667 |
| Clinical case | Reaction time | 1, 87 | 26043.92 | 3.620 | 0.040 | 0.060 |
| Accuracy | 1, 87 | 82.01 | 1.252 | 0.014 | 0.266 |

*Results from statistical analyses assessing the effects of gender, laterality, actor portraying the patient, evaluation order, order of condition, type of condition, and clinical case on reaction time (in ms) and accuracy. All factors report F-values, mean squared error (MSE), and partial eta squared (ƞ²) effect sizes. The Greenhouse-Geisser (GG) correction was applied where necessary. Significant values are marked with an asterisk. Df = degrees of freedom; MSE = mean squared error; ƞ² = partial eta squared.*

**Supplementary Material 7: Events Per Variable (EPV) Calculation and Justification for the confidence measure**

Following Peduzzi et al. (1996)4, an EPV of at least 10 is recommended to prevent issues such as biased coefficient estimates and unreliable significance tests. In our analysis, we considered the less frequent outcome category (N = 1906) as the reference. With five predictor variables, the EPV was 381.2, substantially exceeding the recommended threshold, ensuring the robustness and reliability of our statistical inferences.

**Supplementary Material 8:** **Regression tables for the complete models-Imagery effects on Reaction Time and Accuracy**

**Table S4: *Reaction Time ~ Condition + Modality * Imagery score + Order + Clinical case + (1|ID)* model**

|  | **Est.** | **Std. Error** | **t-value** | **df** | **p-value** | **95% CIL** | **95% CIU** |
| --- | --- | --- | --- | --- | --- | --- | --- |
| Inter. | 6.406 | 0.070 | 90.89 | 82.98 | 4.93e-87 | 6.265 | 6.546 |
| Cond. | 0.062 | 0.017 | 3.58 | 4805 | 3.520e-04 | 0.028 | 0.097 |
| Mod. | 0.022 | 0.017 | 1.28 | 4810 | 0.202 | -0.012 | 0.057 |
| Imag. sc. | -0.037 | 0.023 | -1.57 | 86.19 | 0.121 | -0.083 | 0.010 |
| Order | 0.196 | 0.077 | 2.54 | 78.09 | 0.013 | 0.042 | 0.349 |
| Clin. c. | -0.014 | 0.077 | -0.18 | 78.08 | 0.854 | -0.167 | 0.139 |
| Mod:Imag. sc. | 0.061 | 0.010 | 5.88 | 4809 | 4.37e-09 | 0.041 | 0.082 |

*Inter: Intercept. Cond: Effect of the simulation condition compared to the control condition. Mod: Effect of the modality (video vs written). Imag. sc: Imagery score (centered). Order: Effect of the simulation-control sequence in comparison to the control-simulation sequence. Clin. c: Effect of the clinical case. Model estimates are reported as fixed effect coefficients (Est.), along with their standard errors (SE), t-values (t), degrees of freedom (df), and p-values (p), indicating the probability of obtaining the observed results under the null hypothesis. 95%CIL and CIU: 95% confidence interval, lower and upper boundary.*

**Table S5: *Accuracy ~ Condition + Modality * Imagery score + Order + Clinical case + (1|ID) + (1|STIM)* model**

|  | **Est.** | **Std. Error** | **z-value** | **p-value** | **OR** | **95% CIL** | **95% CIH** |
| --- | --- | --- | --- | --- | --- | --- | --- |
| Inter. | 3.848 | 0.496 | 7.77 | 8.08e-15 | 46.92 | 17.76 | 123.95 |
| Cond. | -0.520 | 0.103 | -5.05 | 4.41e-07 | 0.59 | 0.486 | 0.727 |
| Mod. | -0.207 | 0.103 | -2.01 | 0.044 | 0.81 | 0.665 | 0.995 |
| Imag. sc. | 0.266 | 0.114 | 2.34 | 0.019 | 1.30 | 1.044 | 1.630 |
| Order | -0.861 | 0.370 | -2.33 | 0.020 | 0.42 | 0.205 | 0.873 |
| Clin. c. | 0.260 | 0.366 | 0.70 | 0.485 | 1.29 | 0.630 | 2.650 |
| Mod:Imag. sc. | -0.186 | 0.058 | -3.29 | 0.001 | 0.83 | 0.741 | 0.930 |

*Inter: Intercept. Cond: Effect of the simulation condition compared to the control condition. Mod: Effect of the modality (video vs. written). Imag. sc: Imagery score (centered). Order: Effect of the simulation-control sequence in comparison to the control-simulation sequence. Clin. c: Effect of the clinical case. Model estimates are reported as fixed effect coefficients (Est.), along with their standard errors (SE), z-values (z), and p-values (p), indicating the probability of obtaining the observed results under the null hypothesis. OR: Odds Ratio. 95% CIL and CIH: 95% confidence interval, lower and upper boundary.*

**References**

1. Winer, B. J., Brown, D. R. & Michels, K. M. *Statistical Principles in Experimental Design*. vol. 2 (Mcgraw-hill New York, 1971).

2. Maier, M. & Lakens, D. Justify Your Alpha: A Primer on Two Practical Approaches. *Advances in Methods and Practices in Psychological Science* **5**, 25152459221080396 (2022).

3. Carlin, M. T., Costello, M. S., Flansburg, M. A. & Darden, A. Reconsideration of the type I error rate for psychological science in the era of replication. *Psychological Methods* **29**, 379 (2024).

4. Peduzzi, P., Concato, J., Kemper, E., Holford, T. R. & Feinstein, A. R. A simulation study of the number of events per variable in logistic regression analysis. *Journal of Clinical Epidemiology* **49**, 1373–1379 (1996).
